# Supplementary material for: Should I Eat or Should I Go? Acridid Grasshoppers and Their Novel Host Plants: Potential for Biotic Resistance
Source: MDPI journal article supplement (doi:10.3390/plants7040083), 2018-10-07
Supplement: s1 [file s1]

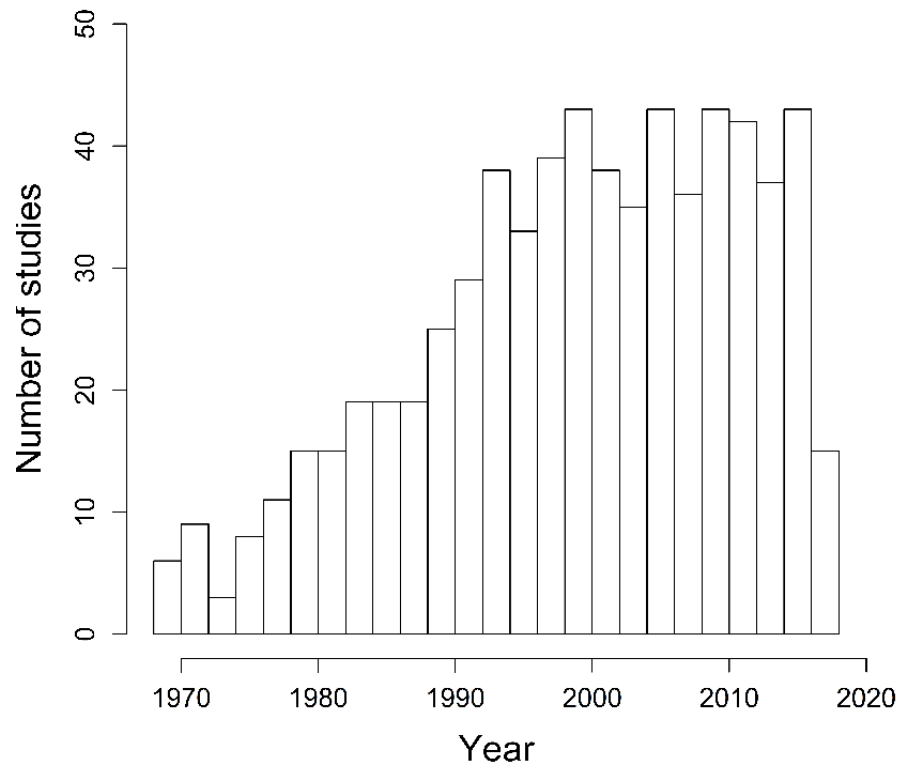

(a)

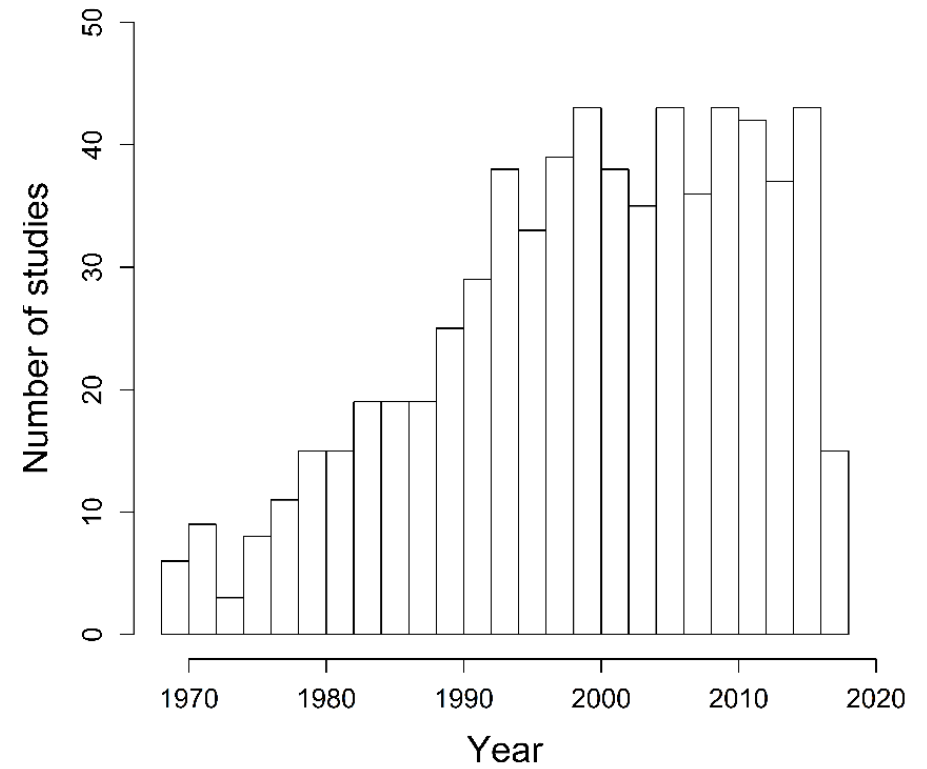

(b)

**Figure S2.** Number of studies on feeding of acridid grasshoppers published during 1967- 2017: **(a)** all studies retrieved from the SpringerLink database; **(b)** studies retrieved from six databases and included in the analysis.
