# Supplementary material for: Should I Eat or Should I Go? Acridid Grasshoppers and Their Novel Host Plants: Potential for Biotic Resistance
Source: Plants (Basel). 2018 Oct 7;7(4):83. doi: 10.3390/plants7040083 (PMC6313845; doi:10.3390/plants7040083)
Supplement: Supplementary file 1 [file plants-07-00083-s001.zip]

Archive with 7 entries (7 files):
- SM_revised2/Fig S1.pdf
- SM_revised2/FigS2.pdf
- SM_revised2/TableS1.docx
- SM_revised2/TableS2.docx
- SM_revised2/TableS3.docx
- SM_revised2/TableS4.docx
- SM_revised2/TableS5.docx
