# Supplementary figures and images for: Should I Eat or Should I Go? Acridid Grasshoppers and Their Novel Host Plants: Potential for Biotic Resistance
Source: MDPI journal article supplement (doi:10.3390/plants7040083), 2018-10-07

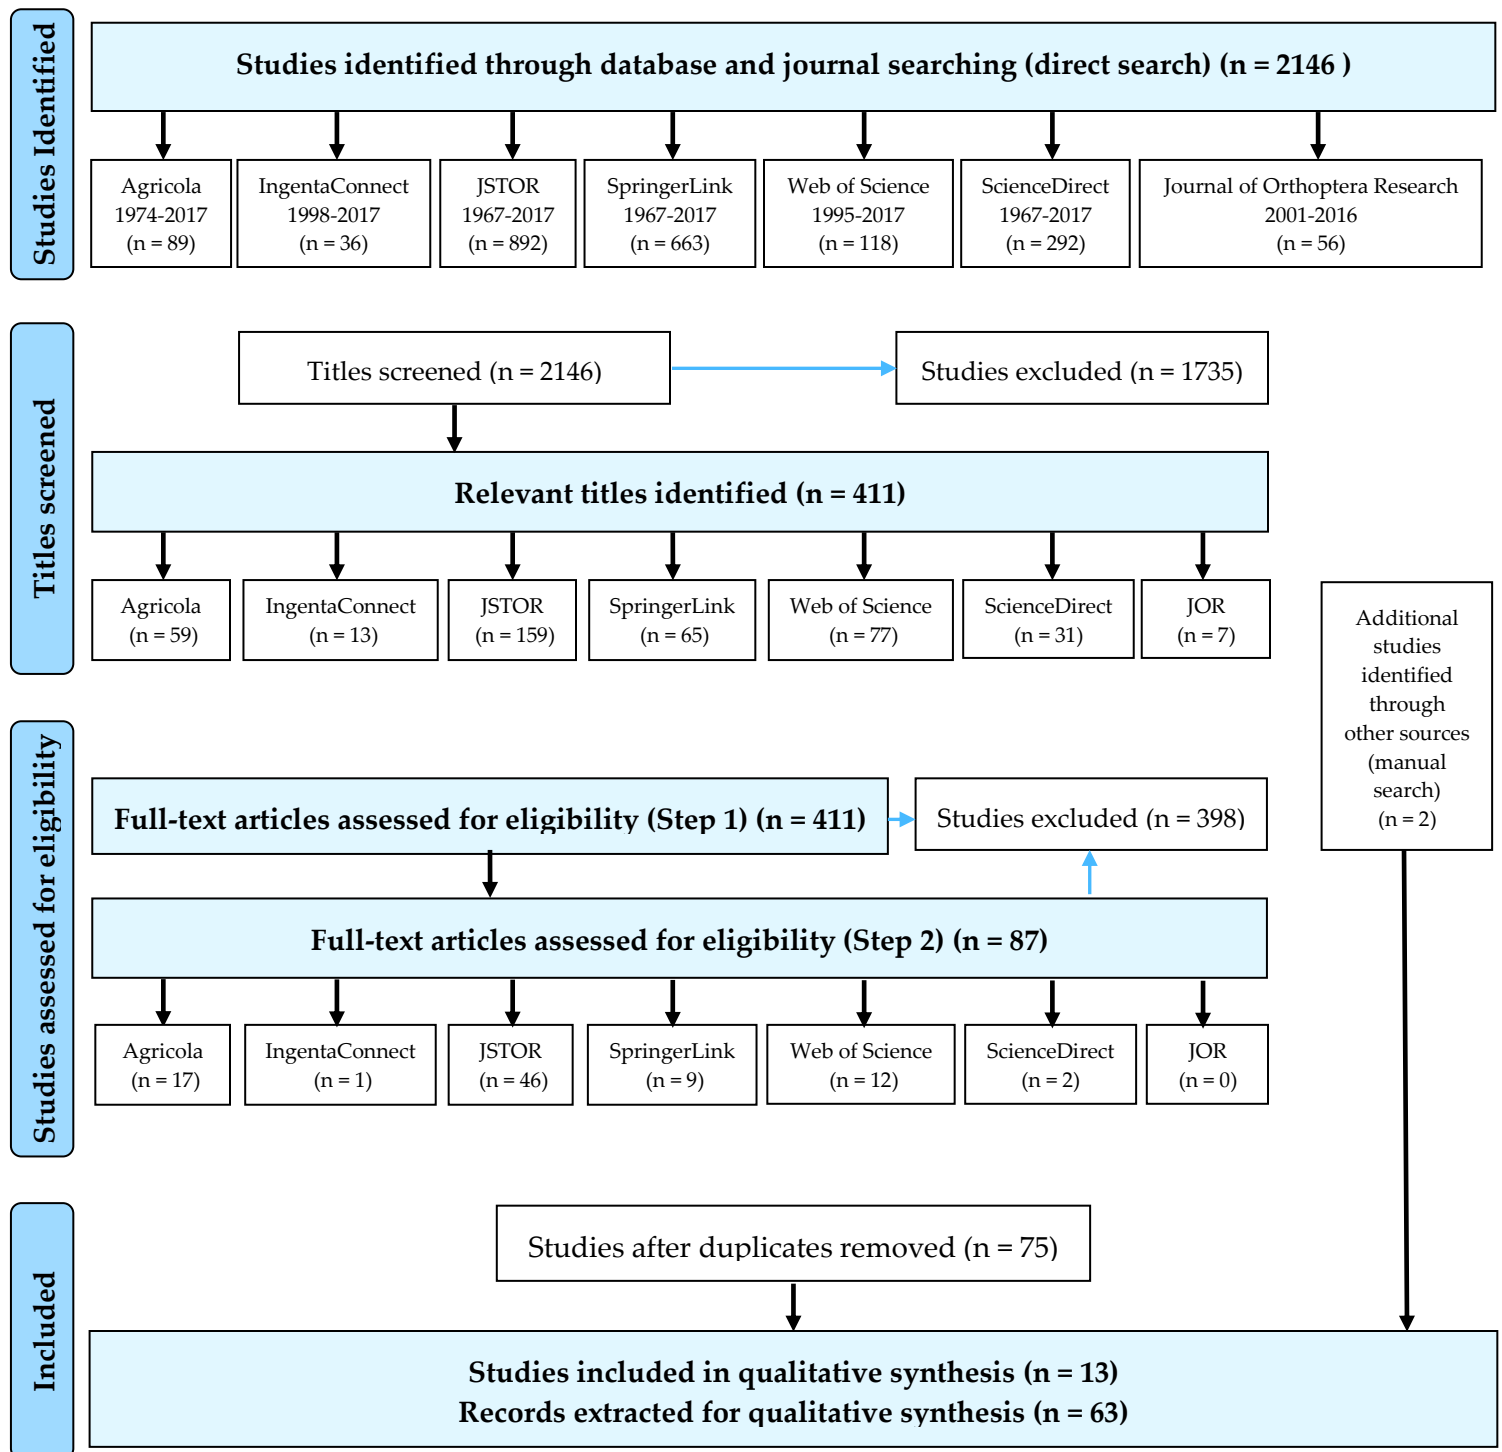

**Figure S1.** Literature search and data collection: PRISMA flowchart (*modified from Moher et al. [63]*).

Supplement: s1 [file s1]
